# Supplementary material for: Conformational change of single-stranded RNAs induced by liposome binding
Source: PubMed Central journal article supplement — Nucleic Acids Res. 2011 Jul 23;39(20):8891–900. doi: 10.1093/nar/gkr568 (PMC3203612; doi:10.1093/nar/gkr568), 2011-07-23
Supplement: supp_gkr568_nar-00717-r-2011-File008.pdf [file supp_gkr568_nar-00717-r-2011-File008.pdf]

1 **Supporting information**

1-Palmitoyl-2-oleoyl-*sn*-glycero-3-phosphocholine (POPC)

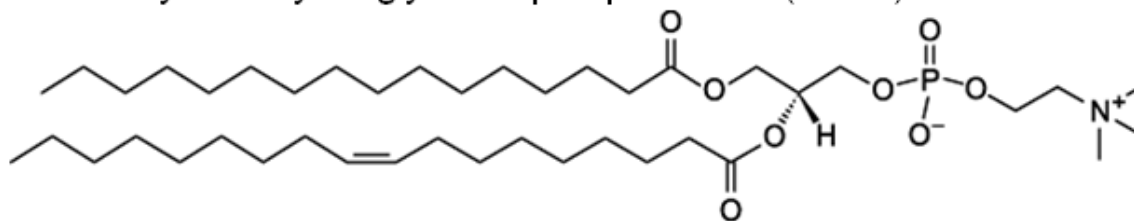

Cholesterol (Ch)

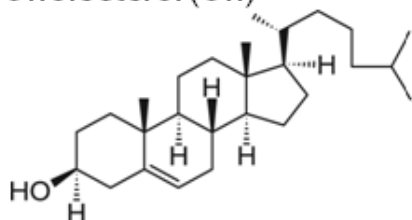

1,2-Dioleoyl-3-trimethylammonium propane (DOTAP)

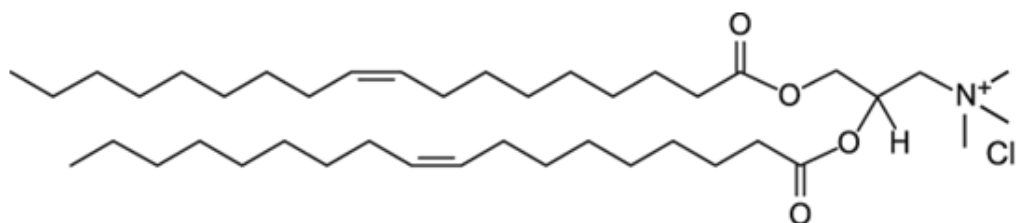

2

3

4 **Fig. S1** The lipid structure of 1-palmitoyl-2-oleoyl-*sn*-glycero-3-phosphocholine (POPC), cholesterol

5 (Ch), and 1,2-dioleoyl-3-trimethylammonium propane (DOTAP).

6

7

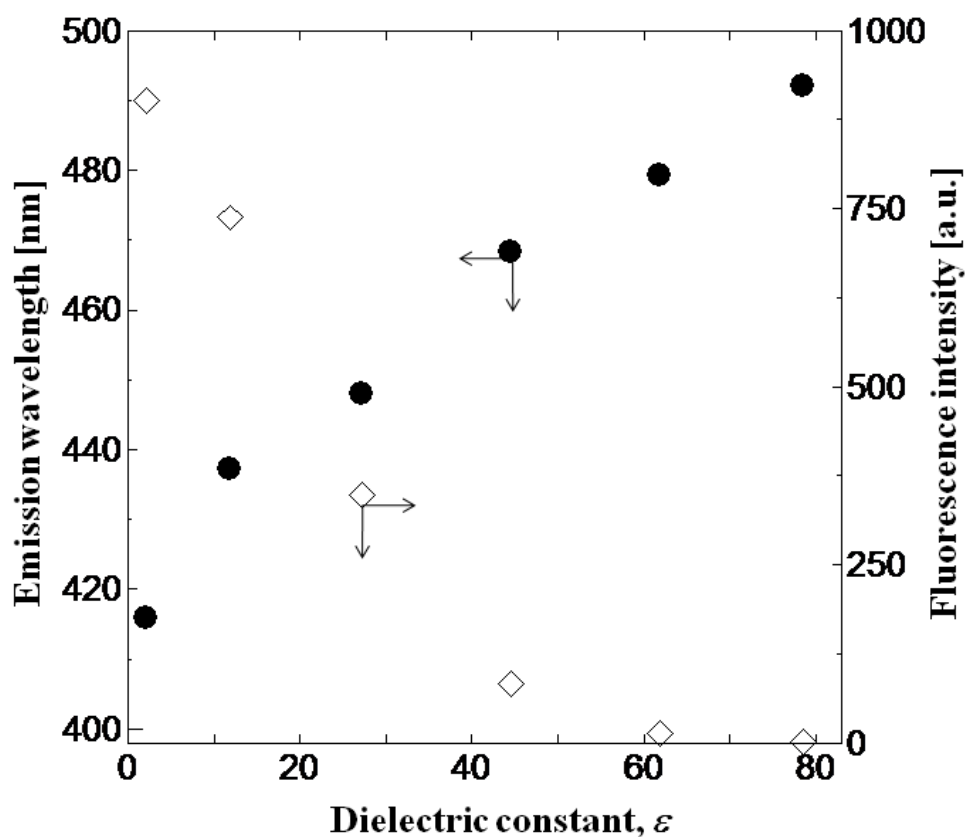

1

2 **Fig. S2** Fluorescence emission peak and intensity of TNS as a function of the dielectric constant. TNS  
 3 fluorescence and emission peaks were measured in water/dioxane solvent, where the  $\epsilon$  value of the  
 4 water/dioxane mixture (v/v %) with 100/0, 80/20, 60/40, 40/60, 20/80, and 0/100 was 78.5, 61.9, 44.5,  
 5 27.2, 11.9, and 2.2, respectively [1]. TNS showed weak fluorescence in water ( $E_m$ : 492 nm); on the  
 6 contrary, its fluorescence was very strong in dioxane solvent ( $E_m$ : 416 nm). The blue shift of TNS  
 7 emission was observed in proportion to the solvent hydrophobicity. In the presence of liposomes, the  
 8 TNS emission peak was 441–446 nm, indicating that TNS was binding to the liposomes' surface region  
 9 ( $\sim 1$  nm depth from lipid-water interface).[1] Critchfield, F.E., Gibson Jr., J.A., Hall, J.L. (1953)  
 10 Dielectric constant for the dioxane-water system from 20 to 35°. *Journal of the American Chemical*  
 11 *Society*, 75 (8), pp. 1991-1992

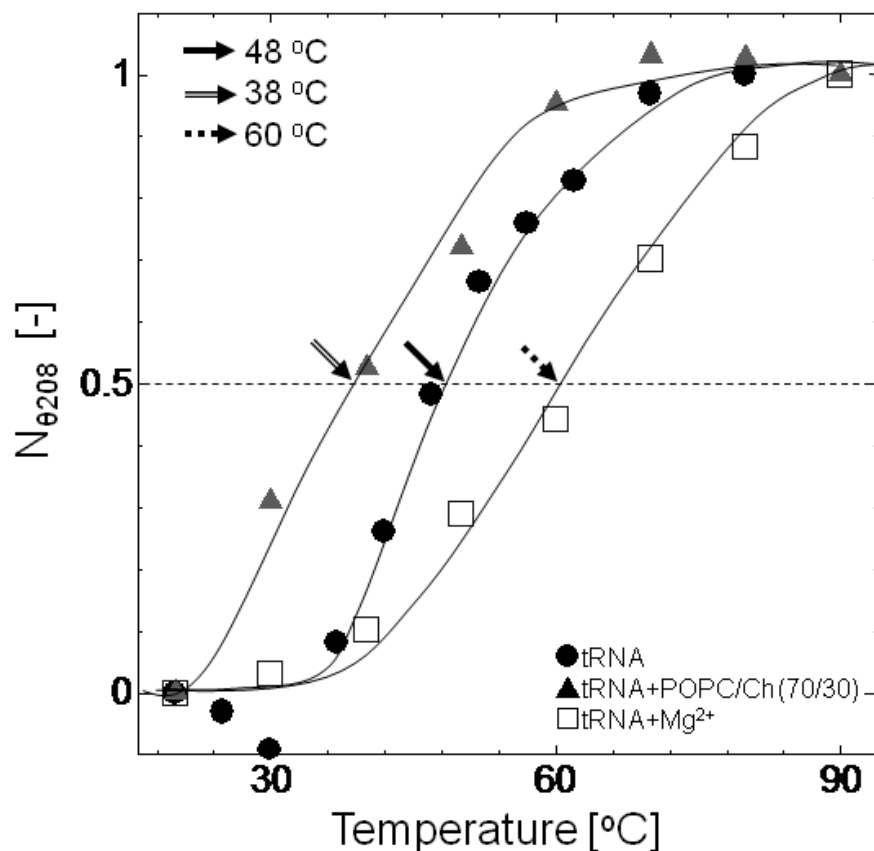

1

2 **Fig. S3** The melting temperature ( $T_m$ ) of tRNA was measured in the presence of  $Mg^{2+}$  or POPC/Ch  
 3 (70/30). CD spectra of tRNA was measured under the heat stress conditions (20-90 °C), and then the  
 4 negative peak at 208 nm ( $\theta_{208}$ ) was normalized based on the following equation (\*); where the value of  
 5  $\theta_{208}$  was minimum at 20 °C ( $\theta_{208,20}$ ) and maximum at 80 °C ( $\theta_{208,80}$ ) in each condition (tRNA with or  
 6 without liposomes,  $Mg^{2+}$ ). Then the temperature with  $N_{\theta_{208}} = 0.5$  was defined as the melting temperature  
 7  $T_m$  [2]. The  $T_m$  value in the presence of various kinds of liposomes was calculated. Similarly, the  $T_m$   
 8 value of mRNA in the presence or absence of liposomes was determined (summarized in **Table 1**). Final  
 9 tRNA, mRNA and lipid concentrations were 2.2  $\mu M$  , 0.77  $\mu M$  and 1.17 mM, respectively. (\*)

10 Normalized  $\theta_{208}$ ,  $N_{\theta_{208}} = (\theta_{208} - \theta_{208,20}) / ((\theta_{208,80} - \theta_{208,20}))$

11 [2] Suga, K., Umakoshi, H., Tomita, H., Tanabe, T., Shimanouchi, T., Kuboi, R. (2010) Liposomes  
 12 destabilize tRNA during heat stress. *Biotechnology Journal*, 5 (5), pp. 526-529

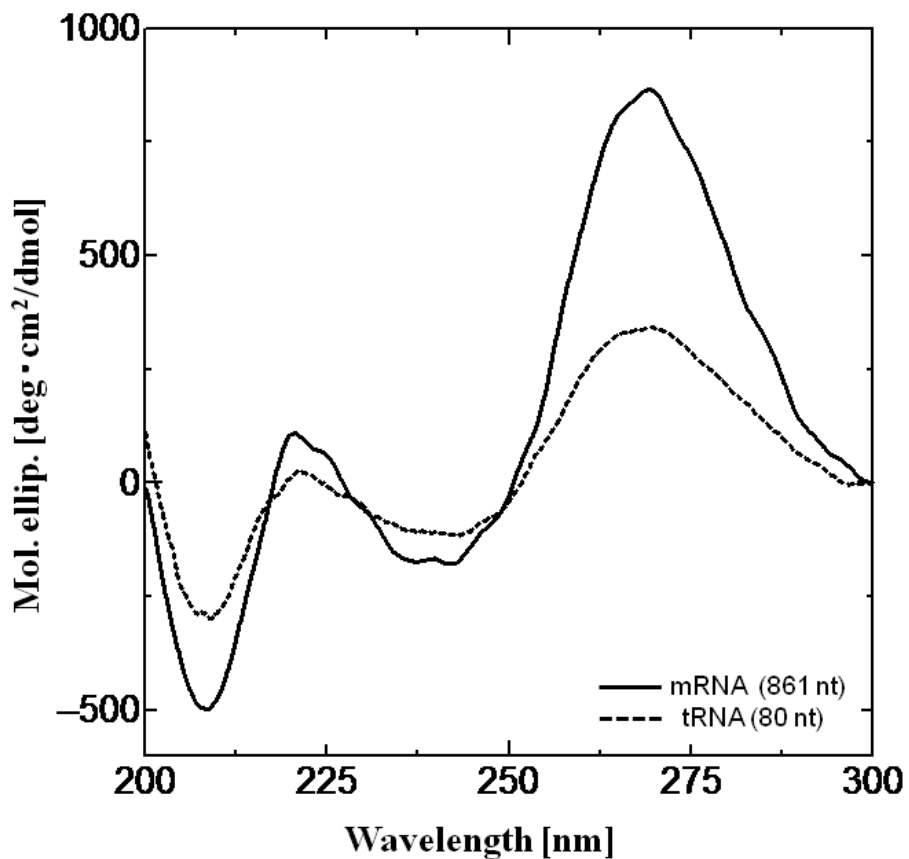

1

2

3 **Fig. S4** The CD spectrum of mRNA and tRNA. Both spectra were found to be an A-form double helix.

4 The difference of the peak intensity (208 nm, 265 nm) was due to the number of nucleotides; mRNA for

5 861 nt, tRNA for 80 nt. Final mRNA or tRNA concentrations were 0.77  $\mu$ M, 2.2  $\mu$ M, respectively. Thus,

6 it was investigated that the conformation of single-stranded mRNA could be evaluated by CD spectra,

7 similar to that of tRNA.

8
